# Supplementary material for: Reprogramming to Pluripotency through a Somatic Stem Cell Intermediate
Source: PLOS journal article supplement (doi:10.1371/journal.pone.0085138), 2013-12-27
Supplement: S4 (10.1371/journal.pone.0085138.s004) [file journal.pone.0085138.s004]

**Supplementary Table S1**

|                     | <b>No. of AP+ colonies well #1</b> | <b>No. of AP+ colonies well #2</b> | <b>Mean ± SD</b> | <b>Efficiency</b> |
|---------------------|------------------------------------|------------------------------------|------------------|-------------------|
| <b>Experiment 1</b> | <b>56</b>                          | <b>44</b>                          | <b>50 ± 8.5</b>  | <b>0.05%</b>      |
| <b>Experiment 2</b> | <b>88</b>                          | <b>88</b>                          | <b>88 ± 0</b>    | <b>0.088%</b>     |

**Supplementary Table S1**

Number of alkaline phosphatase positive (AP+) colonies in two independent reprogramming experiments after 22 and 19 days after transduction, respectively. 100,000 iNSCs were plated in one well of a 6-well plate in duplicates and the reprogramming efficiency was calculated accordingly. SD: standard deviation.
